# Supplementary material for: An investigation on the use of snus and its association with respiratory and sleep-related symptoms: a cross-sectional population study
Source: PubMed Central journal article supplement — BMJ Open. 2017 May 29;7(5):e015486. doi: 10.1136/bmjopen-2016-015486 (PMC5730007; doi:10.1136/bmjopen-2016-015486), 2017-05-29
Supplement: bmjopen-2016-015486supp001.pdf [file bmjopen-2016-015486supp001.pdf]

## Supplementary data

**Table S1:** The crude association between tobacco use and respiratory health and sleep-related symptoms (unadjusted odds ratio (95% CI)).

|                                      | Tobacco users            |                         |                                   |
|--------------------------------------|--------------------------|-------------------------|-----------------------------------|
|                                      | Snus users<br>(n =2,265) | Smokers<br>(n= 3,136)   | Smokers and snus users<br>(n=597) |
| Asthma                               | <b>1.39 (1.19-1.61)</b>  | 0.93 (0.79-1.08)        | 0.83 (0.57-1.18)                  |
| Asthmatic symptoms                   |                          |                         |                                   |
| Wheezing                             | <b>1.47 (1.31-1.64)</b>  | <b>2.78 (2.55-3.03)</b> | <b>1.93 (1.59-2.34)</b>           |
| Wheezing and breathlessness          | <b>1.36 (1.18-1.56)</b>  | <b>2.09 (1.88-2.33)</b> | <b>1.35 (1.04-1.74)</b>           |
| Wheezing without having a cold       | <b>1.50 (1.31-1.72)</b>  | <b>2.64 (2.38-2.92)</b> | <b>2.09 (1.68-2.61)</b>           |
| Night-time chest tightness           | <b>1.16 (1.01-1.32)</b>  | <b>1.68 (1.51-1.87)</b> | <b>1.44 (1.14-1.82)</b>           |
| Night-time attacks of breathlessness | 1.06 (0.88-1.28)         | <b>1.56 (1.35-1.80)</b> | <b>1.67 (1.24-2.23)</b>           |
| Night-time coughing                  | 0.91 (0.82-1.01)         | <b>1.74 (1.61-1.89)</b> | <b>1.47 (1.23-1.75)</b>           |
| Chronic bronchitis                   | <b>1.22 (1.07-1.40)</b>  | <b>2.56 (2.32-2.65)</b> | <b>1.95 (1.57-2.41)</b>           |
| Allergic rhinitis                    | <b>1.16 (1.05-1.28)</b>  | 0.93 (0.85-1.02)        | 0.88 (0.72-1.07)                  |
| Chronic rhinosinusitis               | <b>1.27 (1.09-1.48)</b>  | <b>1.89 (1.68-2.13)</b> | <b>1.92 (1.50-2.44)</b>           |
| Sleeping problems                    |                          |                         |                                   |
| Snoring                              | <b>1.74 (1.56-1.94)</b>  | <b>1.74 (1.58-1.91)</b> | <b>2.44 (2.04-2.93)</b>           |
| DIS <sup>a</sup>                     | <b>1.60 (1.43-1.80)</b>  | <b>2.21 (2.01-2.43)</b> | <b>2.90 (2.41-3.49)</b>           |
| DMS <sup>b</sup>                     | <b>0.65 (0.58-0.72)</b>  | 1.07 (0.98-1.16)        | <b>0.77 (0.63-0.93)</b>           |
| EDS <sup>c</sup>                     | <b>1.13 (1.03-1.24)</b>  | <b>1.35 (1.25-1.47)</b> | <b>1.41 (1.19-1.67)</b>           |
| EMA <sup>d</sup>                     | <b>0.80 (0.70-0.91)</b>  | <b>1.31 (1.18-1.44)</b> | 0.83 (0.65-1.07)                  |
| Use of hypnotics                     | 1.02 (0.83-1.24)         | <b>2.39 (2.10-2.72)</b> | <b>1.99 (1.49-2.64)</b>           |

<sup>a</sup>DIS, difficulty initiating sleep; <sup>b</sup>DMS, difficulty maintaining sleep; <sup>c</sup>EDS, excessive day sleepiness; <sup>d</sup>EMA, early morning awakening at least three to five nights/week

Associations with a *p*-value of < 0.05 are marked as bold
